# Supplementary material for: Risk factors for severe disease and impact of severity on pregnant women with COVID-19: a case–control study based on data from a nationwide survey of maternity services in Japan
Source: HighWire-hosted journal article supplement (doi:10.1136/bmjopen-2022-068575), 2022-12-01
Supplement: bmjopen-2022-068575supp001_data_supplement.pdf [file bmjopen-2022-068575supp001_data_supplement.pdf]

## Survey on novel coronavirus infection in delivery facilities (COVID-19)

Please note ※ Please answer based on the situation from July 2020 ~ June 2021

### 【Questionnaire 1】 Survey on COVID-19 in delivery facilities

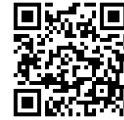

Please answer to the questions on this paper or using the web form. FAX: 03-6685-3718  
You can also answer using the QR code on the right. Deadline: July 31, 2021

| <p>Q1 Have you examined any pregnant or postpartum women with COVID-19? (Including after infection)</p>                                                                                                                           | <input type="checkbox"/> Yes <input type="checkbox"/> No (Go to Q 3)                                                                                                                                                                                                                                                                                                                                                                                                                                                                                                                                                                                                                                                                                                                                                                                                                                                                                                                                                                                                                                    |                                                  |                                                                                          |            |                                  |                              |                                                                                          |                                             |                          |                                                  |                          |                                                     |                          |                          |                          |                                    |                          |                          |                          |                                   |                          |                          |                          |                             |                          |                          |                          |                                     |                          |              |              |            |       |                     |  |  |  |                                                         |  |  |  |           |                                          |  |  |  |           |
|-----------------------------------------------------------------------------------------------------------------------------------------------------------------------------------------------------------------------------------|---------------------------------------------------------------------------------------------------------------------------------------------------------------------------------------------------------------------------------------------------------------------------------------------------------------------------------------------------------------------------------------------------------------------------------------------------------------------------------------------------------------------------------------------------------------------------------------------------------------------------------------------------------------------------------------------------------------------------------------------------------------------------------------------------------------------------------------------------------------------------------------------------------------------------------------------------------------------------------------------------------------------------------------------------------------------------------------------------------|--------------------------------------------------|------------------------------------------------------------------------------------------|------------|----------------------------------|------------------------------|------------------------------------------------------------------------------------------|---------------------------------------------|--------------------------|--------------------------------------------------|--------------------------|-----------------------------------------------------|--------------------------|--------------------------|--------------------------|------------------------------------|--------------------------|--------------------------|--------------------------|-----------------------------------|--------------------------|--------------------------|--------------------------|-----------------------------|--------------------------|--------------------------|--------------------------|-------------------------------------|--------------------------|--------------|--------------|------------|-------|---------------------|--|--|--|---------------------------------------------------------|--|--|--|-----------|------------------------------------------|--|--|--|-----------|
| <p>Q2 What was the management status of pregnant women with a confirmed diagnosis of COVID-19, and how many of them were there? (If transported from home care or accommodation care, select the final management status.)</p>    | <input type="checkbox"/> Management of inpatient admission (including subsequent transfers)                                                                                                                                                                                                                                                                                                                                                                                                                                                                                                                                                                                                                                                                                                                                                                                                                                                                                                                                                                                                             | Person(s)                                        | In case you answer for more than one person, please also answer Questionnaire 2.         |            |                                  |                              |                                                                                          |                                             |                          |                                                  |                          |                                                     |                          |                          |                          |                                    |                          |                          |                          |                                   |                          |                          |                          |                             |                          |                          |                          |                                     |                          |              |              |            |       |                     |  |  |  |                                                         |  |  |  |           |                                          |  |  |  |           |
|                                                                                                                                                                                                                                   | <input type="checkbox"/> Accommodation care                                                                                                                                                                                                                                                                                                                                                                                                                                                                                                                                                                                                                                                                                                                                                                                                                                                                                                                                                                                                                                                             | Person(s)                                        |                                                                                          |            |                                  |                              |                                                                                          |                                             |                          |                                                  |                          |                                                     |                          |                          |                          |                                    |                          |                          |                          |                                   |                          |                          |                          |                             |                          |                          |                          |                                     |                          |              |              |            |       |                     |  |  |  |                                                         |  |  |  |           |                                          |  |  |  |           |
|                                                                                                                                                                                                                                   | <input type="checkbox"/> Home care                                                                                                                                                                                                                                                                                                                                                                                                                                                                                                                                                                                                                                                                                                                                                                                                                                                                                                                                                                                                                                                                      | Person(s)                                        |                                                                                          |            |                                  |                              |                                                                                          |                                             |                          |                                                  |                          |                                                     |                          |                          |                          |                                    |                          |                          |                          |                                   |                          |                          |                          |                             |                          |                          |                          |                                     |                          |              |              |            |       |                     |  |  |  |                                                         |  |  |  |           |                                          |  |  |  |           |
|                                                                                                                                                                                                                                   | <input type="checkbox"/> Referral or transfer to another hospital                                                                                                                                                                                                                                                                                                                                                                                                                                                                                                                                                                                                                                                                                                                                                                                                                                                                                                                                                                                                                                       | Person(s)                                        |                                                                                          |            |                                  |                              |                                                                                          |                                             |                          |                                                  |                          |                                                     |                          |                          |                          |                                    |                          |                          |                          |                                   |                          |                          |                          |                             |                          |                          |                          |                                     |                          |              |              |            |       |                     |  |  |  |                                                         |  |  |  |           |                                          |  |  |  |           |
|                                                                                                                                                                                                                                   | <input type="checkbox"/> Only pregnancy and delivery management after infection was performed.                                                                                                                                                                                                                                                                                                                                                                                                                                                                                                                                                                                                                                                                                                                                                                                                                                                                                                                                                                                                          | Person(s)                                        |                                                                                          |            |                                  |                              |                                                                                          |                                             |                          |                                                  |                          |                                                     |                          |                          |                          |                                    |                          |                          |                          |                                   |                          |                          |                          |                             |                          |                          |                          |                                     |                          |              |              |            |       |                     |  |  |  |                                                         |  |  |  |           |                                          |  |  |  |           |
| <input type="checkbox"/> Other (Please be specific.)                                                                                                                                                                              | Person(s)                                                                                                                                                                                                                                                                                                                                                                                                                                                                                                                                                                                                                                                                                                                                                                                                                                                                                                                                                                                                                                                                                               |                                                  |                                                                                          |            |                                  |                              |                                                                                          |                                             |                          |                                                  |                          |                                                     |                          |                          |                          |                                    |                          |                          |                          |                                   |                          |                          |                          |                             |                          |                          |                          |                                     |                          |              |              |            |       |                     |  |  |  |                                                         |  |  |  |           |                                          |  |  |  |           |
| <p>Q3 What is your policy if a pregnant woman with the conditions on the right has labor onset or premature rupture of membrane after 37 weeks of gestation?<br/><br/>Please answer the status as of the end of June 1, 2021.</p> | <table border="1"> <thead> <tr> <th></th> <th>SARS-CoV-2 antigen test positive</th> <th>SARS-CoV-2 PCR test positive</th> <th>Close contacts (During the health observation period after confirming a negative result)</th> </tr> </thead> <tbody> <tr> <td>Cesarean section (Adaptation for infection)</td> <td><input type="checkbox"/></td> <td><input type="checkbox"/></td> <td><input type="checkbox"/></td> </tr> <tr> <td>Planned vaginal delivery (Adaptation for infection)</td> <td><input type="checkbox"/></td> <td><input type="checkbox"/></td> <td><input type="checkbox"/></td> </tr> <tr> <td>According to obstetric indications</td> <td><input type="checkbox"/></td> <td><input type="checkbox"/></td> <td><input type="checkbox"/></td> </tr> <tr> <td>Transportation to other hospitals</td> <td><input type="checkbox"/></td> <td><input type="checkbox"/></td> <td><input type="checkbox"/></td> </tr> <tr> <td>Other (Please be specific.)</td> <td><input type="checkbox"/></td> <td><input type="checkbox"/></td> <td><input type="checkbox"/></td> </tr> </tbody> </table> |                                                  |                                                                                          |            | SARS-CoV-2 antigen test positive | SARS-CoV-2 PCR test positive | Close contacts (During the health observation period after confirming a negative result) | Cesarean section (Adaptation for infection) | <input type="checkbox"/> | <input type="checkbox"/>                         | <input type="checkbox"/> | Planned vaginal delivery (Adaptation for infection) | <input type="checkbox"/> | <input type="checkbox"/> | <input type="checkbox"/> | According to obstetric indications | <input type="checkbox"/> | <input type="checkbox"/> | <input type="checkbox"/> | Transportation to other hospitals | <input type="checkbox"/> | <input type="checkbox"/> | <input type="checkbox"/> | Other (Please be specific.) | <input type="checkbox"/> | <input type="checkbox"/> | <input type="checkbox"/> |                                     |                          |              |              |            |       |                     |  |  |  |                                                         |  |  |  |           |                                          |  |  |  |           |
|                                                                                                                                                                                                                                   | SARS-CoV-2 antigen test positive                                                                                                                                                                                                                                                                                                                                                                                                                                                                                                                                                                                                                                                                                                                                                                                                                                                                                                                                                                                                                                                                        | SARS-CoV-2 PCR test positive                     | Close contacts (During the health observation period after confirming a negative result) |            |                                  |                              |                                                                                          |                                             |                          |                                                  |                          |                                                     |                          |                          |                          |                                    |                          |                          |                          |                                   |                          |                          |                          |                             |                          |                          |                          |                                     |                          |              |              |            |       |                     |  |  |  |                                                         |  |  |  |           |                                          |  |  |  |           |
| Cesarean section (Adaptation for infection)                                                                                                                                                                                       | <input type="checkbox"/>                                                                                                                                                                                                                                                                                                                                                                                                                                                                                                                                                                                                                                                                                                                                                                                                                                                                                                                                                                                                                                                                                | <input type="checkbox"/>                         | <input type="checkbox"/>                                                                 |            |                                  |                              |                                                                                          |                                             |                          |                                                  |                          |                                                     |                          |                          |                          |                                    |                          |                          |                          |                                   |                          |                          |                          |                             |                          |                          |                          |                                     |                          |              |              |            |       |                     |  |  |  |                                                         |  |  |  |           |                                          |  |  |  |           |
| Planned vaginal delivery (Adaptation for infection)                                                                                                                                                                               | <input type="checkbox"/>                                                                                                                                                                                                                                                                                                                                                                                                                                                                                                                                                                                                                                                                                                                                                                                                                                                                                                                                                                                                                                                                                | <input type="checkbox"/>                         | <input type="checkbox"/>                                                                 |            |                                  |                              |                                                                                          |                                             |                          |                                                  |                          |                                                     |                          |                          |                          |                                    |                          |                          |                          |                                   |                          |                          |                          |                             |                          |                          |                          |                                     |                          |              |              |            |       |                     |  |  |  |                                                         |  |  |  |           |                                          |  |  |  |           |
| According to obstetric indications                                                                                                                                                                                                | <input type="checkbox"/>                                                                                                                                                                                                                                                                                                                                                                                                                                                                                                                                                                                                                                                                                                                                                                                                                                                                                                                                                                                                                                                                                | <input type="checkbox"/>                         | <input type="checkbox"/>                                                                 |            |                                  |                              |                                                                                          |                                             |                          |                                                  |                          |                                                     |                          |                          |                          |                                    |                          |                          |                          |                                   |                          |                          |                          |                             |                          |                          |                          |                                     |                          |              |              |            |       |                     |  |  |  |                                                         |  |  |  |           |                                          |  |  |  |           |
| Transportation to other hospitals                                                                                                                                                                                                 | <input type="checkbox"/>                                                                                                                                                                                                                                                                                                                                                                                                                                                                                                                                                                                                                                                                                                                                                                                                                                                                                                                                                                                                                                                                                | <input type="checkbox"/>                         | <input type="checkbox"/>                                                                 |            |                                  |                              |                                                                                          |                                             |                          |                                                  |                          |                                                     |                          |                          |                          |                                    |                          |                          |                          |                                   |                          |                          |                          |                             |                          |                          |                          |                                     |                          |              |              |            |       |                     |  |  |  |                                                         |  |  |  |           |                                          |  |  |  |           |
| Other (Please be specific.)                                                                                                                                                                                                       | <input type="checkbox"/>                                                                                                                                                                                                                                                                                                                                                                                                                                                                                                                                                                                                                                                                                                                                                                                                                                                                                                                                                                                                                                                                                | <input type="checkbox"/>                         | <input type="checkbox"/>                                                                 |            |                                  |                              |                                                                                          |                                             |                          |                                                  |                          |                                                     |                          |                          |                          |                                    |                          |                          |                          |                                   |                          |                          |                          |                             |                          |                          |                          |                                     |                          |              |              |            |       |                     |  |  |  |                                                         |  |  |  |           |                                          |  |  |  |           |
| <p>Q4 Does your facility offer PCR tests for SARS-CoV-2 for asymptomatic pregnant women hospitalized for labor?</p>                                                                                                               | <table border="1"> <thead> <tr> <th rowspan="2"></th> <th rowspan="2">No</th> <th colspan="3">Yes</th> </tr> <tr> <th colspan="3">Test were conducted in the past. (2020.7-2021.6)</th> </tr> <tr> <th></th> <th></th> <th>Start Date</th> <th>Start Date</th> <th>End Date</th> </tr> </thead> <tbody> <tr> <td>All women</td> <td><input type="checkbox"/></td> <td>Month/Year ~</td> <td>Month/Year ~</td> <td>Month/Year</td> </tr> <tr> <td>Upon request</td> <td><input type="checkbox"/></td> <td>Month/Year ~</td> <td>Month/Year ~</td> <td>Month/Year</td> </tr> <tr> <td>Only for scheduled cesarean section</td> <td><input type="checkbox"/></td> <td>Month/Year ~</td> <td>Month/Year ~</td> <td>Month/Year</td> </tr> <tr> <td>Other</td> <td colspan="4">Please be specific.</td> </tr> <tr> <td colspan="4">Number of pregnant women examined above (approximately)</td> <td>Person(s)</td> </tr> <tr> <td colspan="4">Number of positive cases among the above</td> <td>Person(s)</td> </tr> </tbody> </table>                                                                        |                                                  |                                                                                          |            |                                  | No                           | Yes                                                                                      |                                             |                          | Test were conducted in the past. (2020.7-2021.6) |                          |                                                     |                          |                          | Start Date               | Start Date                         | End Date                 | All women                | <input type="checkbox"/> | Month/Year ~                      | Month/Year ~             | Month/Year               | Upon request             | <input type="checkbox"/>    | Month/Year ~             | Month/Year ~             | Month/Year               | Only for scheduled cesarean section | <input type="checkbox"/> | Month/Year ~ | Month/Year ~ | Month/Year | Other | Please be specific. |  |  |  | Number of pregnant women examined above (approximately) |  |  |  | Person(s) | Number of positive cases among the above |  |  |  | Person(s) |
|                                                                                                                                                                                                                                   | No                                                                                                                                                                                                                                                                                                                                                                                                                                                                                                                                                                                                                                                                                                                                                                                                                                                                                                                                                                                                                                                                                                      | Yes                                              |                                                                                          |            |                                  |                              |                                                                                          |                                             |                          |                                                  |                          |                                                     |                          |                          |                          |                                    |                          |                          |                          |                                   |                          |                          |                          |                             |                          |                          |                          |                                     |                          |              |              |            |       |                     |  |  |  |                                                         |  |  |  |           |                                          |  |  |  |           |
|                                                                                                                                                                                                                                   |                                                                                                                                                                                                                                                                                                                                                                                                                                                                                                                                                                                                                                                                                                                                                                                                                                                                                                                                                                                                                                                                                                         | Test were conducted in the past. (2020.7-2021.6) |                                                                                          |            |                                  |                              |                                                                                          |                                             |                          |                                                  |                          |                                                     |                          |                          |                          |                                    |                          |                          |                          |                                   |                          |                          |                          |                             |                          |                          |                          |                                     |                          |              |              |            |       |                     |  |  |  |                                                         |  |  |  |           |                                          |  |  |  |           |
|                                                                                                                                                                                                                                   |                                                                                                                                                                                                                                                                                                                                                                                                                                                                                                                                                                                                                                                                                                                                                                                                                                                                                                                                                                                                                                                                                                         | Start Date                                       | Start Date                                                                               | End Date   |                                  |                              |                                                                                          |                                             |                          |                                                  |                          |                                                     |                          |                          |                          |                                    |                          |                          |                          |                                   |                          |                          |                          |                             |                          |                          |                          |                                     |                          |              |              |            |       |                     |  |  |  |                                                         |  |  |  |           |                                          |  |  |  |           |
| All women                                                                                                                                                                                                                         | <input type="checkbox"/>                                                                                                                                                                                                                                                                                                                                                                                                                                                                                                                                                                                                                                                                                                                                                                                                                                                                                                                                                                                                                                                                                | Month/Year ~                                     | Month/Year ~                                                                             | Month/Year |                                  |                              |                                                                                          |                                             |                          |                                                  |                          |                                                     |                          |                          |                          |                                    |                          |                          |                          |                                   |                          |                          |                          |                             |                          |                          |                          |                                     |                          |              |              |            |       |                     |  |  |  |                                                         |  |  |  |           |                                          |  |  |  |           |
| Upon request                                                                                                                                                                                                                      | <input type="checkbox"/>                                                                                                                                                                                                                                                                                                                                                                                                                                                                                                                                                                                                                                                                                                                                                                                                                                                                                                                                                                                                                                                                                | Month/Year ~                                     | Month/Year ~                                                                             | Month/Year |                                  |                              |                                                                                          |                                             |                          |                                                  |                          |                                                     |                          |                          |                          |                                    |                          |                          |                          |                                   |                          |                          |                          |                             |                          |                          |                          |                                     |                          |              |              |            |       |                     |  |  |  |                                                         |  |  |  |           |                                          |  |  |  |           |
| Only for scheduled cesarean section                                                                                                                                                                                               | <input type="checkbox"/>                                                                                                                                                                                                                                                                                                                                                                                                                                                                                                                                                                                                                                                                                                                                                                                                                                                                                                                                                                                                                                                                                | Month/Year ~                                     | Month/Year ~                                                                             | Month/Year |                                  |                              |                                                                                          |                                             |                          |                                                  |                          |                                                     |                          |                          |                          |                                    |                          |                          |                          |                                   |                          |                          |                          |                             |                          |                          |                          |                                     |                          |              |              |            |       |                     |  |  |  |                                                         |  |  |  |           |                                          |  |  |  |           |
| Other                                                                                                                                                                                                                             | Please be specific.                                                                                                                                                                                                                                                                                                                                                                                                                                                                                                                                                                                                                                                                                                                                                                                                                                                                                                                                                                                                                                                                                     |                                                  |                                                                                          |            |                                  |                              |                                                                                          |                                             |                          |                                                  |                          |                                                     |                          |                          |                          |                                    |                          |                          |                          |                                   |                          |                          |                          |                             |                          |                          |                          |                                     |                          |              |              |            |       |                     |  |  |  |                                                         |  |  |  |           |                                          |  |  |  |           |
| Number of pregnant women examined above (approximately)                                                                                                                                                                           |                                                                                                                                                                                                                                                                                                                                                                                                                                                                                                                                                                                                                                                                                                                                                                                                                                                                                                                                                                                                                                                                                                         |                                                  |                                                                                          | Person(s)  |                                  |                              |                                                                                          |                                             |                          |                                                  |                          |                                                     |                          |                          |                          |                                    |                          |                          |                          |                                   |                          |                          |                          |                             |                          |                          |                          |                                     |                          |              |              |            |       |                     |  |  |  |                                                         |  |  |  |           |                                          |  |  |  |           |
| Number of positive cases among the above                                                                                                                                                                                          |                                                                                                                                                                                                                                                                                                                                                                                                                                                                                                                                                                                                                                                                                                                                                                                                                                                                                                                                                                                                                                                                                                         |                                                  |                                                                                          | Person(s)  |                                  |                              |                                                                                          |                                             |                          |                                                  |                          |                                                     |                          |                          |                          |                                    |                          |                          |                          |                                   |                          |                          |                          |                             |                          |                          |                          |                                     |                          |              |              |            |       |                     |  |  |  |                                                         |  |  |  |           |                                          |  |  |  |           |

Q5 Please feel free to state your opinion. (opinions on COVID-19 infection and puerperal management, etc.)
